# Supplementary material
Source: PubMed Central journal article supplement (PMC1458906)

**before treatment**

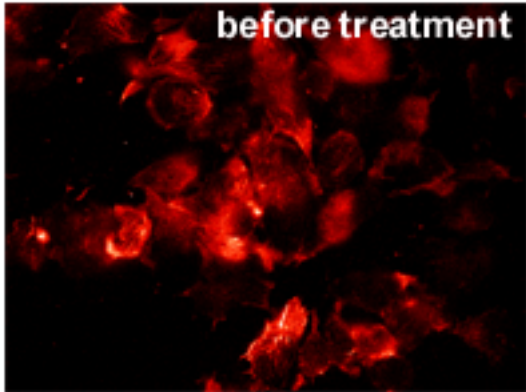

**after treatment**

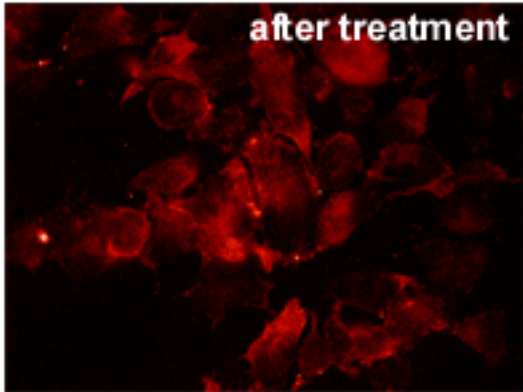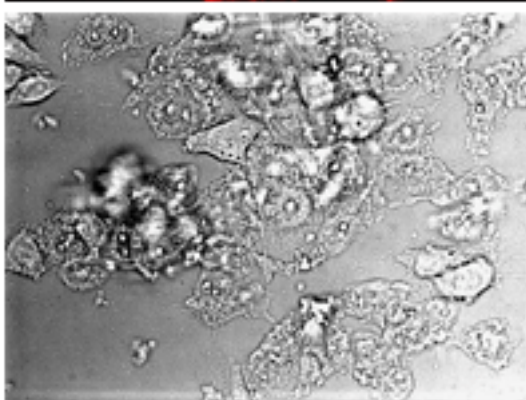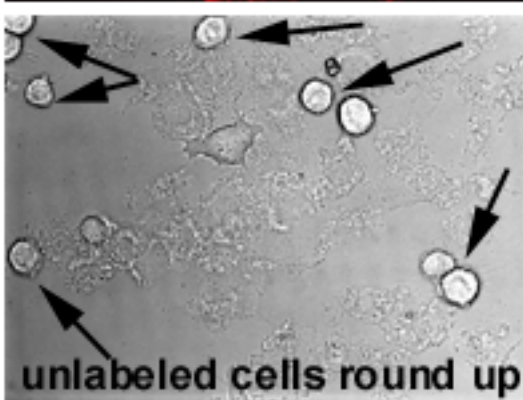

Supplement: pnas_0601463103_4.pdf [file pnas_0601463103_4.pdf]
